# Supplementary material
Source: ML conference proceedings conference paper supplement (https://proceedings.mlr.press/v119/ustimenko20a.html)
Supplement: Supplementary file [file ustimenko20a-supp.pdf]

---

# Supplementary Materials

## StochasticRank: Global Optimization of Scale-Free Discrete Functions

---

Aleksii Ustimenko<sup>1</sup> Liudmila Prokhorenkova<sup>1 2 3</sup>

*Table 1. Notation.*

| Variable                                    | Description                                |
|---------------------------------------------|--------------------------------------------|
| $z \in \mathbb{R}^n$                        | Vector of scores                           |
| $\xi \in \Xi_n$                             | Vector of contexts                         |
| $r \in \mathbb{R}^n$                        | Vector of relevance labels                 |
| $\theta \in \mathbb{R}^m$                   | Vector of parameters                       |
| $L(z, \xi)$                                 | Loss function                              |
| $L_\xi^\pi(z, \sigma)$                      | Smoothed loss function                     |
| $L_\xi^\pi(z, \sigma   z')$                 | SFA smoothing of the loss                  |
| $\mathcal{L}(\theta)$                       | Expected loss                              |
| $\mathcal{L}_N(\theta)$                     | Empirical loss                             |
| $\mathcal{L}_N^\pi(\theta, \sigma)$         | Smoothed empirical loss                    |
| $\mathcal{L}_N^\pi(\theta, \sigma, \gamma)$ | Regularized and consistently smoothed loss |
| $\mathcal{R}_0$                             | Scale-free discrete loss functions         |
| $\mathcal{R}_1$                             | Ranking loss functions                     |
| $\mathcal{R}_1^{soft}$                      | Soft ranking loss functions                |
| $\pi_\xi(z)$                                | Distribution density for smoothing         |
| $p_\beta(\theta)$                           | Invariant measure of parameters            |
| $p_\beta(F)$                                | Invariant measure of predictions           |
| $\sigma > 0$                                | Smoothing standart deviation               |
| $\beta > 0$                                 | Diffusion temperature                      |
| $\gamma > 0$                                | Regularization parameter                   |
| $\mu \geq 0$                                | Relevance shifting parameter               |
| $\nu > 0$                                   | Scale-Free Acceleration parameter          |

### A. Proof of Statement 1

Let us prove that the set  $\arg \min_{\theta \in \mathbb{R}^m} \mathcal{L}_N(\theta)$  is not empty.

Consider  $U_{ij}$  being open and convex sets for  $V_i = \text{im} \Phi_{\xi_i}$  (see Discreteness on subspaces in Definition 1 in the main text). Then,  $U'_{ij} = \Phi_{\xi_i}^{-1} U_{ij} \subset \mathbb{R}^m$  are also open and convex. Henceforth, the function  $\mathcal{L}_N$  can be written as (ignoring the sets of zero measure):

$$\mathcal{L}_N(\theta) = N^{-1} \sum_{j_1=1}^{k_1} \dots \sum_{j_N=1}^{k_N} c_{j_1, \dots, j_N} \mathbb{1}_{\theta \in \cap_{i=1}^N U'_{ij_i}}. \quad (1)$$

Henceforth, the function  $\mathcal{L}_N$  is also discrete with open con-

---

<sup>1</sup>Yandex, Moscow, Russia <sup>2</sup>Moscow Institute of Physics and Technology, Dolgoprudny, Moscow Region, Russia <sup>3</sup>Higher School of Economics, Moscow, Russia. Correspondence to: Aleksii Ustimenko <austimenko@yandex-team.ru>.

vex sets  $\mathcal{U}_s := \cap_{i=1}^N U'_{ij_i}$  on the whole space  $\mathbb{R}^m$ . Hence, its arg min is one of these sets or their union.

### B. Stochastic smoothing

#### B.1. Mollification

A natural approach for smoothing is mollification (Ermoliev et al., 1995; Dolecki et al., 1983): choose a smooth enough distribution with p.d.f.  $\pi(\theta)$ , consider the family of distributions  $\pi_\delta(\theta) = \delta^{-m} \pi(\delta^{-1} \theta)$ , and let  $\mathcal{L}_N(\theta, \delta) := \mathcal{L}_N * \pi_\delta \equiv \mathbb{E}_{\epsilon \sim \pi} \mathcal{L}_N(\theta + \delta \epsilon)$ . Then, the minimizers of  $\mathcal{L}_N(\theta, \delta)$  convergence to the minimizer of  $\mathcal{L}_N(\theta)$ . Unfortunately, despite theoretical soundness, it is hard to derive efficient gradient estimates even in the linear case  $f_{\xi_i}(\theta) = \Phi_{\xi_i} \theta$ . Moreover, in the gradient boosting setting, we do not have access to all possible coordinates of  $\theta$  at each iteration. Henceforth, we cannot use the mollification approach directly.

Thus, instead of acting on the level of parameters  $\theta$ , we act on the level of scores  $z$ :  $L_\xi^\pi(z, \sigma) := \mathbb{E} L(z + \sigma \epsilon, \xi)$ , where  $\epsilon$  has p.d.f.  $\pi(z)$ . We multiply the noise by  $\sigma$  to preserve Scalar-freeness in a sense that  $L_\xi^\pi(\lambda z, \lambda \sigma) = L_\xi^\pi(z, \sigma)$  for any  $\lambda > 0$ .

In the linear case  $f(\theta) = \Phi \theta$ , if  $\text{rk} \Phi = n$ , it is not hard to show the convergence of minimizers. Indeed, we can obtain mollification by “bypassing” the noise from scores to parameters by multiplying on  $\Phi^{-1}$ . However, in general, we cannot assume  $\text{rk} \Phi = n$ .

#### B.2. Proof of Theorem 1

The trick is to proceed with  $L(f_{\xi_i}(\theta), \xi_i)$  and to show that there exists an open and dense set  $U_{\xi_i} \subset \mathbb{R}^m$  such that the convergence is locally uniform as  $\sigma \rightarrow 0_+$ ,  $\mu \rightarrow \infty$ ,  $\sigma \mu \rightarrow 0_+$ .

Let us proceed with proving the existence of such  $U_{\xi_i} \forall i$ . Let us define

$$U_{\xi_i} := \left\{ \theta \in \mathbb{R}^m : \forall j \neq j' (f_{\xi_i}(\theta)_j = f_{\xi_i}(\theta)_{j'}) \Rightarrow \forall \theta' \in \mathbb{R}^m (f_{\xi_i}(\theta')_j = f_{\xi_i}(\theta')_{j'}) \right\}.$$

Clearly, the set is not empty, open, and dense. Now, take an arbitrary  $\theta \in U_{\xi_i}$ . Consider  $z = f_{\xi_i}(\theta)$  and divide the set  $\{1, \dots, n_i\}$  into disjoint subsets  $J_1, \dots, J_k$  such that all components  $z_j$  corresponding to one group are equal and all components  $z_j$  corresponding to different  $J$ 's are different. Clearly, we need to "resolve" only those which are equal: for small enough  $\sigma \approx 0, \sigma\mu \approx 0$  we obtain that even after adding the noise  $f_{\xi_i}(\theta') - \sigma\mu r + \sigma\varepsilon$  the order of  $J$ 's is preserved with high probability uniformly in some vicinity of  $\theta$ , whilst for large enough  $\mu \gg 1$  we obtain the worst case permutation of  $z_j$  corresponding to the one group with high probability uniformly on the whole  $U_{\xi_i}$ . Thus, we obtain locally uniform convergence  $\mathbb{E}L(f_{\xi_i}(\theta) - \sigma\mu r + \sigma\varepsilon, \xi_i) \rightarrow L(f_{\xi_i}(\theta), \xi_i)$ .

### B.3. Proof of Theorem 2

Clearly, the conditions of the theorem imply that for general  $\theta$  w.l.o.g. we can assume that  $\Phi_{\xi_i}\theta \in U_{ij_i}$  for some indexes  $j_i$ . Henceforth, after adding the noise with  $\sigma \rightarrow 0_+$  we must obtain locally uniform approximation since the functions  $L(z, \xi_i)$  are locally constant in a vicinity of  $z = \Phi_{\xi_i}\theta \forall i$ .

### B.4. Consistent smoothing for LSO

**Theorem 1.** *In gradient boosting, if  $L(\cdot, \cdot) \in \mathcal{R}_0$  is coming from the LSO problem, then any smoothing is consistent.*

*Proof.* Conditions from Theorem 2 of the main text translate into a condition that  $(\Phi_{\xi}\theta)_j \neq 0$  for all  $j$  and for all  $\theta$  almost surely. This can be enforced by adding a free constant to the linear model, but in the gradient boosting setting this condition is essentially satisfied: consider  $\theta = \mathbb{1}_m$ , then  $(\Phi_{\xi}\mathbb{1}_m)_j \geq 1 \forall j$  since the matrix  $\Phi_{\xi}$  is 0-1 matrix and have at least one "1" in each row (every item falls to at least one leaf of each tree). Henceforth, for any general  $\theta$  we can assume another general  $\tilde{\theta} = \theta + \nu\mathbb{1}_m$ , where  $\nu$  is any random variable with absolute continuous p.d.f. This in turn implies  $(\Phi_{\xi}\tilde{\theta})_j \neq 0$  almost surely. Henceforth, Theorem 2 holds ensuring the consistency of smoothing.  $\square$

## C. Coordinate Conditional Sampling

### C.1. Proof of Lemma 1

Consider a line  $H = \{(z_j, z_{\setminus j}) : \forall z_j \in \mathbb{R}\}$  and subsets  $U_1, \dots, U_k$  for  $k = k(n, \mathbb{R}^n)$  from the Discreteness on subspaces assumption for  $V = \mathbb{R}^n$ . Then  $U_i \cap H = (a_i, b_i) \times \{z_{\setminus j}\}$  due to openness and convexity of  $U_i$  for  $a_i, b_i \in \mathbb{R} \cup \{\pm\infty\}$ . Moreover,  $(U_i \cap H) \cap (U_{i'} \cap H) = \emptyset \forall i \neq i'$  and, by ignoring sets of zero measure, we can assume that  $\cup_i (a_i, b_i) \times \{z_{\setminus j}\} = H$ . After that, we can take all finite  $\{b_1, \dots, b_k\} \cap \mathbb{R}$  as breaking points.

### C.2. Proof of Theorem 3

Observe that  $L * \pi_{\xi}^j$  tautologically equals  $l_j * \pi_{\xi}^j$  and the convolution is distributive with respect to summation, so we can write:

$$L * \pi_{\xi}^j = \sum_{s=1}^{k'} \Delta l_j(b_s) \mathbb{1}_{\{z_j \leq b_s\}} * \pi_{\xi}^j + \text{const}(z_{\setminus j}).$$

The convolution  $\mathbb{1}_{\{z_j \leq b_s\}} * \pi_{\xi}^j$  is equal to  $\mathbb{P}_{\xi}(z_j + \sigma\varepsilon_j < b_s | \varepsilon_{\setminus j}) := \sigma^{-1} \int_{\mathbb{R}} \mathbb{1}_{\{z_j + \sigma\varepsilon_j \leq b_s\}} \pi_{\xi}^j(\sigma^{-1}\varepsilon_j) d\varepsilon_j$ , allowing us to rewrite:

$$\begin{aligned} L * \pi_{\xi}^j &= \sum_{s=1}^{k'} \Delta l_j(b_s) \mathbb{P}_{\xi}(\varepsilon_j < \sigma^{-1}(b_s - z_j) | \varepsilon_{\setminus j}) + \text{const}(z_{\setminus j}). \end{aligned}$$

The above formula is ready for differentiation since each term is actually a  $C^{(2)}(\mathbb{R})$  function by the variable  $z_j$ :

$$\frac{\partial}{\partial z_j} L * \pi_{\xi}^j = -\sigma^{-1} \sum_{s=1}^{k'} \Delta l_j(b_s) \pi_{\xi}^j(\sigma^{-1}(b_s - z_j)).$$

After the convolution with  $\pi_{\xi}^{\setminus j}$ , we finally get the required formula.

### C.3. Proof of Corollary 1

For LTR ( $\mathcal{R}_1$  and  $\mathcal{R}_1^{\text{soft}}$ ), all these  $b_s$  actually lay in  $\{z_1, \dots, z_n\} \subset \mathbb{R}$  due to Pairwise decision boundary assumption and, henceforth, we do not need to compute them, we just need to take coordinates of  $z \in \mathbb{R}^n$  as breaking points and note that if some of  $z_s$  is not a breaking point for  $L(z, \xi)$ , then essentially  $\Delta l_j(z_s) = 0$ . Then, we can write

$$\frac{\partial}{\partial z_j} L * \pi_{\xi}^j = -\sigma^{-1} \sum_{s=1}^n \Delta l_j(z_s) \pi_{\xi}^j(\sigma^{-1}(z_s - z_j)).$$

Let us note that for LSO, we can actually take  $k' = 1$  and  $b_1 = 0$  and simplify the formula to:

$$l_j(z_j) = \Delta l_j \mathbb{1}_{\{z_j \leq 0\}} + \text{const}(z_{\setminus j}).$$

### C.4. Proof of Theorem 4

**Lemma 1.** *The function  $L_{\xi}^{\pi}(z, \sigma)$  satisfies the following linear first order Partial Differential Equation (PDE):*

$$\frac{\partial}{\partial \sigma} L_{\xi}^{\pi}(z, \sigma) = -\sigma^{-1} \langle \nabla_z L_{\xi}^{\pi}(z, \sigma), z \rangle_2.$$

*Proof.* The proof is a direct consequence of Scalar-Freeness: we just need to differentiate the equality  $L_{\xi}^{\pi}(\alpha z, \alpha\sigma) \equiv L_{\xi}^{\pi}(z, \sigma)$  (holding for  $\alpha > 0$ ) by  $\alpha$  and set  $\alpha = 1$ .  $\square$

**Lemma 2.**  $\frac{\partial}{\partial \sigma} L_\xi^\pi(z, \sigma)$  is uniformly bounded by  $\mathcal{O}(\sigma^{-1})$ .

*Proof.* Consider writing  $L_\xi^\pi(z, \sigma)$  in the integral form:

$$L_\xi^\pi(z, \sigma) = \sigma^{-n} \int_{\mathbb{R}^n} L(z + \varepsilon, \xi) \pi(\sigma^{-1} \varepsilon) d\varepsilon.$$

By Fubini's theorem, we can pass the differentiation  $\frac{\partial}{\partial \sigma}$  to inside the integral and obtain:

$$\begin{aligned} \frac{\partial}{\partial \sigma} L_\xi^\pi(z, \sigma) &= -n\sigma^{-n-1} \int_{\mathbb{R}^n} L(z + \varepsilon, \xi) \pi(\sigma^{-1} \varepsilon) d\varepsilon \\ &\quad - \sigma^{-n-2} \int_{\mathbb{R}^n} L(z + \varepsilon, \xi) \langle \nabla \pi(\sigma^{-1} \varepsilon), \varepsilon \rangle d\varepsilon. \end{aligned}$$

Consider the variable  $\varepsilon' = \sigma^{-1} \varepsilon$ , then we arrive at

$$\begin{aligned} \frac{\partial}{\partial \sigma} L_\xi^\pi(z, \sigma) &= -n\sigma^{-1} \int_{\mathbb{R}^n} L(z + \sigma \varepsilon, \xi) \pi(\varepsilon) d\varepsilon \\ &\quad - \sigma^{-1} \int_{\mathbb{R}^n} L(z + \sigma \varepsilon, \xi) \langle \nabla \pi(\varepsilon), \varepsilon \rangle d\varepsilon. \end{aligned}$$

Taking the absolute value of both sides and using the triangle inequality, we derive

$$\left| \frac{\partial}{\partial \sigma} L_\xi^\pi \right| \leq n l \sigma^{-1} + l \sigma^{-1} \int_{\mathbb{R}^n} \|\nabla \pi(\varepsilon)\|_2 \|\varepsilon\|_2 d\varepsilon,$$

where  $l = \sup_z |L(z, \xi)| < \infty$  by the Uniform boundedness assumption and the last integral is well defined by the Derivative decay assumption.  $\square$

**Corollary 1.**  $\sup_z \left| \langle \nabla_z L_\xi^\pi, z \rangle \right| = \mathcal{O}(1)$  independently from  $\sigma$ .

*Proof.* Immediate consequence of the previous lemmas.  $\square$

Now, assume that  $\sigma = \sigma(z)$  is differentiable and non-zero at  $z$ . The following lemma describes  $\nabla_z L_\xi^\pi(z, \sigma(z))$  in terms of  $\nabla_z L_\xi^\pi := \nabla_z L_\xi^\pi(z, \sigma) \Big|_{\sigma=\sigma(z)}$ .

**Lemma 3.** The following formula holds:

$$\nabla_z L_\xi^\pi(z, \sigma(z)) = \nabla_z L_\xi^\pi - \langle \nabla_z L_\xi^\pi, z \rangle_2 \nabla_z \log \sigma(z).$$

*Proof.* Consider writing

$$\nabla_z L_\xi^\pi(z, \sigma(z)) = \nabla_z L_\xi^\pi + \frac{\partial}{\partial \sigma} L_\xi^\pi(z, \sigma(z)) \nabla_z \sigma(z).$$

Then, by Lemma 1 we obtain the formula.  $\square$

## D. Fast ranking metrics computation

We need to be able to compute  $L(z', z_{\setminus s_i} + \sigma \varepsilon_{\setminus s_i}, \xi)$  for an arbitrary  $z' \in \mathbb{R}$  and a position  $i$ , where  $s \in S_n$  represents  $s := \text{argsort}(z + \sigma \varepsilon)$  for the CCS estimate (note that there is no ambiguity in computing  $\text{argsort}$  since with probability one  $z_{j_1} + \sigma \varepsilon_{j_1} \neq z_{j_2} + \sigma \varepsilon_{j_2}$  for  $j_1 \neq j_2$ ). Moreover,  $\text{argsort}$  requires  $\mathcal{O}(n \log n)$  operations.

Typically, the evaluation of  $L(\dots)$  costs  $\mathcal{O}(n)$ , e.g., for ERR. Fortunately, for many losses it is possible to exploit the structure of the loss that allows evaluating  $L$  in  $\mathcal{O}(1)$  operations using some precomputed shared cumulative statistics related to the loss which can be computed in  $\mathcal{O}(n)$  operations and  $\mathcal{O}(n)$  memory.

For all  $L \in \mathcal{R}_1$  in the worst case we need  $\mathcal{O}(n^2)$  evaluations of  $L$  to compute the CCS (for each of  $n$  coordinates to sum up at most  $n$  evaluations). Thus, the overall worst case asymptotic of the algorithm would be  $\mathcal{O}(n \log n + n + n^2) = \mathcal{O}(n^2)$  if the evaluation costs  $\mathcal{O}(1)$ . For the sake of simplicity, we generalize both NDCG@k and ERR into one class of losses:

$$L(z, \xi) = - \sum_{i=1}^n w_i g(r_{s_i}) \prod_{j=1}^{i-1} d_{s_j}, \quad (2)$$

where  $W = \{w_i\}_{i=1}^n$  are some predefined positions' weights typically picked as  $\frac{\mathbb{1}_{\{i \leq k\}}}{\max_z \text{DCG@k} \log(i+1)}$  for NDCG@k and  $\frac{1}{i}$  for ERR;  $D = \{d_i\}_{i=1}^n$  is typically picked as  $d_i = 1 \forall i$  for  $-$ NDCG@k and  $d_i = 1 - r_i \forall i$  for ERR; and finally we define  $g(r) = r$  for  $r \in [0, 1]$  and  $g(r) = \frac{2^r - 1}{2^4 - 1}$  for  $r \in \{0, 1, 2, 3, 4\}$ .

First, we need to define and compute the following cumulative product:

$$p_m = d_{s_{m-1}} p_{m-1} = \prod_{j=1}^{m-1} d_{s_j} \text{ if } m > 1,$$

where  $p_1 = 1$ . Denote  $P := \{p_i\}_{i=1}^n$ . Next, we use them we define the following cumulative sums:

$$S_m^{\text{up}} = S_{m-1}^{\text{up}} + w_{m+1} g(r_{s_m}) p_m \text{ if } m > 1,$$

$$S_m^{\text{mid}} = S_{m-1}^{\text{mid}} + w_m g(r_{s_m}) p_m \text{ if } m > 0,$$

$$S_m^{\text{low}} = S_{m-1}^{\text{low}} + w_{m-1} g(r_{s_m}) p_m \text{ if } m > 0,$$

where  $S_0^{\text{up}} = S_1^{\text{up}} = S_0^{\text{mid}} = S_0^{\text{low}} = 0$ .

All these cumulative statistics can be computed at the same time while we compute  $L(z + \sigma \varepsilon, \xi)$ . Note that we need additional  $\mathcal{O}(n)$  memory to store these statistics.

Now fix a position  $i$  and score  $z'$ . Express  $L(z', z_{\setminus s_i} + \sigma \varepsilon_{\setminus s_i}, \xi)$  as  $(L(z', z_{\setminus s_i} + \sigma \varepsilon_{\setminus s_i}, \xi) - L(z + \sigma \varepsilon, \xi)) + L(z +$

$\sigma\varepsilon, \xi$ ). Thus, we need to compute  $L(z', z_{\setminus s_i} + \sigma\varepsilon_{\setminus s_i}, \xi) - L(z + \sigma\varepsilon, \xi)$ .

If  $z' > z_{s_i} + \sigma\varepsilon_{s_i}$ , we define  $i' := i$ ; otherwise, define  $i' := i - 1$  — this variable represents the new position of the  $s_i$ -th document in  $z + \sigma\varepsilon$ . Also, if  $z' > z_{s_i} + \sigma\varepsilon_{s_i}$ , we define:

$$\begin{aligned} T^{\text{low}} &= S_{i'}^{\text{mid}} - S_i^{\text{mid}}, \\ T^{\text{up}} &= d_{s_i}^{-1}(S_{i'}^{\text{up}} - S_i^{\text{up}}), \\ w &= w_i p_i, \\ w' &= w_i d_{s_i}^{-1} p_{i'}. \end{aligned}$$

Otherwise, define:

$$\begin{aligned} T^{\text{low}} &= d_{s_i}(S_{i'}^{\text{low}} - S_{i-1}^{\text{low}}), \\ T^{\text{up}} &= S_{i'}^{\text{mid}} - S_{i-1}^{\text{mid}}, \\ w &= w_i p_i, \\ w' &= w_{i-1} p_{i'}. \end{aligned}$$

Then, we calculate  $L(z', z_{\setminus s_i} + \sigma\varepsilon_{\setminus s_i}, \xi) - L(z + \sigma\varepsilon, \xi)$  as  $g(r_{s_i})(w - w') - (T^{\text{up}} - T^{\text{low}})$ . The meaning of the formula is simple: we measure the change of gain of the  $s_i$ -th document if we change its score to  $z'$  from  $z_{s_i} + \sigma\varepsilon_{s_i}$  minus the difference of gains of all documents on positions from  $i'$  up to  $i - 1$ , if  $i' < i$ , and from  $i + 1$  up to  $i' - 1$ , if  $i' > i$ .

The above formulas can be verified directly by evaluating the cases when  $z' > z_{s_i} + \sigma\varepsilon_{s_i}$  or  $z' < z_{s_i} + \sigma\varepsilon_{s_i}$  and expanding  $S_m^*$  as  $\sum_i w_{i\pm 1} g(r_{s_i}) p_i$ . Note that all differences  $S_i^* - S_j^*$  take into account all documents on positions from  $j + 1$  up to  $i$  inclusively.

Note that  $S_n^{\text{mid}} \equiv L(z + \sigma\varepsilon, \xi)$ . Indeed,

$$\sum_{i=1}^n w_i g(r_{s_i}) p_i = \sum_{i=1}^n w_i g(r_{s_i}) \prod_{j=1}^{i-1} d_{s_j} = L(z + \sigma\varepsilon, \xi).$$

Therefore, we obtain:

$$\begin{aligned} L(z', z_{\setminus s_i} + \sigma\varepsilon_{\setminus s_i}, \xi) &= g(r_{s_i})(w - w') \\ &\quad - (T^{\text{up}} - T^{\text{low}}) + S_k^{\text{mid}}. \end{aligned} \quad (3)$$

## E. Global Optimization by Diffusion

### E.1. Overview of SGLB idea

Global convergence of SGLB is guaranteed by a so-called Predictions' Space Langevin Dynamics Stochastic Differential Equation

$$\begin{aligned} dF(t) &= -\gamma F(t) dt - P \nabla_F \mathcal{L}_N^\pi(F(t), \sigma) dt \\ &\quad + \sqrt{2\beta^{-1} P} dW(t), \end{aligned}$$

where  $F(t) := \Phi\theta(t) = (\Phi_{\xi_1}\theta(t), \dots, \Phi_{\xi_N}\theta(t)) = (f_{\xi_1}(\theta), \dots, f_{\xi_N}(\theta)) \in \mathbb{R}^{N'}$  denotes the predictions Markov Process on the train set  $\mathcal{D}_N$ ,  $W(t)$  is a standard Wiener process with values in  $\mathbb{R}^{N'}$ ,  $N' := \sum_{i=1}^N n_i$ ,  $P = P^T$  is an implicit preconditioner matrix of the boosting algorithm, and  $\beta > 0$  is a temperature parameter that controls exploration/exploitation trade-off. Note that here we override the notation  $\mathcal{L}_N(F) \equiv \mathcal{L}_N(\theta)$  since  $F = \Phi\theta$ . Further by  $\Gamma = \sqrt{P^{-1}}$  we denote an implicitly defined regularization matrix.

The global convergence is implied by the fact that as  $t \rightarrow \infty$ , the stationary distribution  $p_\beta(F)$  of  $F(t)$  concentrates around the global optima of the implicitly regularized loss

$$\mathcal{L}_N^\pi(F, \sigma, \gamma) = \mathcal{L}_N^\pi(F, \sigma) + \frac{\gamma}{2} \|\Gamma F\|_2^2.$$

More formally, the stationary distribution is  $p_\beta(F) \propto \exp(-\beta \mathcal{L}_N^\pi(F, \sigma, \gamma))$ . According to [Ustimenko & Prokhorenkova \(2020\)](#), optimization is performed within a linear space  $V := \text{im } \Phi$  that encodes all possible predictions  $F$  of all possible ensembles formed by the weak learners associated with the boosting algorithm. We refer interested readers to [\(Ustimenko & Prokhorenkova, 2020\)](#) for the details.

### E.2. Proof of Theorem 5

Let us first prove the following lemma.

**Lemma 4.** *The function  $\mathcal{L}_N^\pi(F, \sigma)$  is uniformly bounded, Lipschitz continuous with constant  $L_0 = \mathcal{O}(\sigma^{-1})$ , and Lipschitz smooth with constant  $L_1 = \mathcal{O}(\sigma^{-2})$ .*

*Proof.* The proof of Lipschitz continuity is a direct consequence of the uniform boundedness by  $\mathcal{O}(\sigma^{-1})$  of CCS. If we differentiate CCS estimate one more time, we obtain the estimates for the Hessian that must be uniformly bounded by  $\mathcal{O}(\sigma^{-2})$  due to the uniform boundedness of  $\nabla\pi$ , thus giving Lipschitz smoothness.  $\square$

In addition to Lipschitz smoothness, continuity, and boundedness from above, we also need  $\|\widehat{\nabla}_{CC} \mathcal{L}_N^\pi(F, \sigma) - \nabla \mathcal{L}_N^\pi(F, \sigma)\|_2 = \mathcal{O}(1)$  ([Ustimenko & Prokhorenkova, 2020](#)), but that condition is satisfied since both terms are uniformly bounded by  $\mathcal{O}(\sigma^{-1})$ . Thus, the algorithm has limiting stationary measure  $p_\beta(F) \propto \exp(-\beta \mathcal{L}_N^\pi(F, \sigma, \gamma))$ .

Then, consistency of the smoothing ensures that as  $\sigma \rightarrow 0_+$ ,  $p_\beta(F) \rightarrow p_\beta^*(F)$ , where  $p_\beta^*(F) \propto \exp(-\beta(\mathcal{L}_N(F) + \frac{\gamma}{2} \|\Gamma F\|_2^2))$  and thus for  $\beta \gg 1$  the measures  $p_\beta^*$  and  $p_\beta$  for  $\sigma \approx 0$  concentrate around the global optima of  $\mathcal{L}_N(F)$ .

### E.3. Proof of Theorem 6

Following [Raginsky et al. \(2017\)](#); [Ustimenko & Prokhorenkova \(2020\)](#), we immediately obtain that

$|\mathbb{E}_{\theta \sim p_{\beta}(\theta)} \mathcal{L}^{\pi}(\theta, \sigma) - \mathbb{E}_{\theta \sim p_{\beta}(\theta)} \mathcal{L}_{N}^{\pi}(\theta, \sigma)| = \mathcal{O}\left(\frac{(\beta+d)^2}{N\lambda_*}\right)$  with  $\lambda_* > 0$  and  $d = V_{\mathcal{B}}$ . In general non-convex case  $\frac{1}{\lambda_*}$  can be of order  $\exp(\mathcal{O}(d))$  (Raginsky et al., 2017) but for smoothed SF losses we can give a better estimate without exponential dependence on the dimension.

Observe that our measure is the sum of uniformly bounded Lipschitz smooth with constant  $\mathcal{O}(\sigma^{-2})$  and a Gaussian  $\frac{\gamma}{2} \|\Gamma\Phi\theta\|_2^2$ , then the more appropriate bound from the logarithmic Sobolev inequality applies according to Lemma 2.1 (Bardet et al., 2015)  $\frac{1}{\lambda_*} = \mathcal{O}\left(\frac{\exp(\mathcal{O}(\frac{\beta}{\gamma\sigma^2}))}{\gamma\beta}\right)$  being dimension-free. Note that Miclo’s trick in the proof of the lemma should be skipped since  $\mathcal{L}_{N}^{\pi}(\theta, \sigma)$  is already fine enough. Coupling the spectral gap bound with the generalization gap, we obtain the theorem.

## F. Parameter tuning

For tuning, we use the random search (500 samples) with the following distributions:

- For *learning-rate* log-uniform distribution over  $[10^{-3}, 1]$ .
- For *l2-leaf-reg* log-uniform distribution over  $[10^{-1}, 10^1]$  for baselines and *l2-leaf-reg=0* for StochasticRank.
- For noise strength (Bruch et al., 2020) uniform distribution over  $[0, 1]$ .
- For *depth* uniform distribution over  $\{6, 7, 8, 9, 10\}$ .
- For *model-shrink-rate* log-uniform distribution over  $[10^{-5}, 10^{-2}]$  for StochasticRank.
- For *diffusion-temperature* log-uniform distribution over  $[10^8, 10^{11}]$  for StochasticRank.
- For *mu* log-uniform distribution over  $[10^{-2}, 10]$  for StochasticRank- $\mathcal{R}_1$ .

## References

Bardet, J.-B., Gozlan, N., Malrieu, F., and Zitt, P.-A. Functional inequalities for Gaussian convolutions of compactly supported measures: explicit bounds and dimension dependence. *arXiv e-prints*, art. arXiv:1507.02389, 2015.

Bruch, S., Han, S., Bendersky, M., and Najork, M. A stochastic treatment of learning to rank scoring functions. In *Proceedings of the 13th ACM International Conference on Web Search and Data Mining (WSDM 2020)*, pp. 61–69, 2020.

Dolecki, S., Salinetti, G., and Wets, R. J.-B. Convergence of functions: equi-semicontinuity. *Transactions of the American Mathematical Society*, 276(1):409–429, 1983.

Ermoliev, Y., Norkin, V., and Wets, R. The minimization of semicontinuous functions: mollifier subgradients. *SIAM Journal on Control and Optimization*, 33, 01 1995.

Raginsky, M., Rakhlin, A., and Telgarsky, M. Non-convex learning via stochastic gradient langevin dynamics: a nonasymptotic analysis. *CoRR*, abs/1702.03849, 2017.

Ustimenko, A. and Prokhorenkova, L. SGLB: Stochastic Gradient Langevin Boosting. *arXiv e-prints*, art. arXiv:2001.07248, 2020.
